# Supplementary material for: Nutrients in the US Diet: Naturally Occurring or Enriched/Fortified Food and Beverage Sources, Plus Dietary Supplements: NHANES 2009–2012
Source: PubMed Central journal article supplement — J Nutr. 2019 May 27;149(8):1404–12. doi: 10.1093/jn/nxz066 (PMC6686054; doi:10.1093/jn/nxz066), 2019-05-27
Supplement: nxz066_supplemental_files.pdf [file nxz066_supplemental_files.pdf]

**Supplemental Table 1.** Usual Intake from NHANES 2009-2012 Compared to the Dietary Reference Intakes (DRI) from Nutrients as Naturally Occurring, Enriched/Fortified, and Dietary Supplements among **Children 2-8 years of age** in the U.S. Population <sup>1</sup>

| Nutrient                                  | Usual Intake <sup>2-3</sup> | Percentiles |      |      |      |      | % < EAR <sup>3-4</sup> |
|-------------------------------------------|-----------------------------|-------------|------|------|------|------|------------------------|
|                                           |                             | 10          | 25   | 50   | 75   | 90   |                        |
| <b>Vitamin A, µg RAE/d</b> <sup>5-6</sup> |                             |             |      |      |      |      |                        |
| Naturally occurring                       | 402 ± 0.0                   | 210         | 279  | 375  | 496  | 629  | 19.4 ± 20.4            |
| + Enriched/fortified                      | 672 ± 1.0                   | 354         | 471  | 631  | 830  | 1044 | 2.9 ± 0.4              |
| + Dietary supplements                     | --                          | --          | --   | --   | --   | --   | --                     |
| <b>Vitamin D, µg/d</b> <sup>7-8</sup>     |                             |             |      |      |      |      |                        |
| Naturally occurring                       | 1.3 ± 0.0                   | 0.6         | 0.9  | 1.2  | 1.7  | 2.2  | 100 ± 0.0              |
| + Enriched/fortified                      | 7.3 ± 0.0                   | 3.5         | 4.9  | 6.8  | 9.1  | 11.7 | 81.4 ± 1.4             |
| + Dietary supplements                     | 9.4 ± 0.0                   | 3.8         | 5.4  | 7.8  | 11.7 | 16.6 | 66.5 ± 1.0             |
| <b>Vitamin E, mg AT/d</b> <sup>6,9</sup>  |                             |             |      |      |      |      |                        |
| Naturally occurring                       | 5.7 ± 0.0                   | 3.2         | 4.2  | 5.4  | 7.0  | 8.6  | 54.3 ± 1.2             |
| + Enriched/fortified                      | 6.4 ± 0.0                   | 3.5         | 4.6  | 6.0  | 7.7  | 9.7  | 44.6 ± 1.4             |
| + Dietary supplements                     | --                          | --          | --   | --   | --   | --   | --                     |
| <b>Vitamin C, mg/d</b> <sup>9</sup>       |                             |             |      |      |      |      |                        |
| Naturally occurring                       | 52.3 ± 0.0                  | 17.8        | 28.1 | 44.6 | 68.0 | 96.4 | 12.1 ± 1.0             |
| + Enriched/fortified                      | 91.8 ± 0.0                  | 35.7        | 53.7 | 81.1 | 118  | 161  | 1.9 ± 0.4              |
| + Dietary supplements                     | 107 ± 0.2                   | 38.9        | 59.1 | 90.2 | 132  | 182  | 1.6 ± 0.2              |
| <b>Vitamin B-6, mg/d</b> <sup>10</sup>    |                             |             |      |      |      |      |                        |
| Naturally occurring                       | 1.2 ± 0.0                   | 0.7         | 0.9  | 1.2  | 1.4  | 1.7  | 1.0 ± 0.2              |
| + Enriched/fortified                      | 1.7 ± 0.0                   | 1.0         | 1.2  | 1.6  | 2.0  | 2.4  | 0.1 ± 0.0              |
| + Dietary supplements                     | 2.0 ± 0.0                   | 1.0         | 1.3  | 1.7  | 2.3  | 3.2  | 0.2 ± 0.0              |
| <b>Vitamin B-12, µg/d</b> <sup>10</sup>   |                             |             |      |      |      |      |                        |
| Naturally occurring                       | 3.9 ± 0.0                   | 2.2         | 2.8  | 3.7  | 4.8  | 6.0  | 0.1 ± 0.0              |
| + Enriched/fortified                      | 5.2 ± 0.0                   | 2.7         | 3.6  | 4.9  | 6.5  | 8.2  | 0.1 ± 0.0              |
| + Dietary supplements                     | 6.3 ± 0.0                   | 2.9         | 4.0  | 5.5  | 7.9  | 10.6 | 0.1 ± 0.0              |
| <b>Folate, µg DFE/d</b> <sup>10-11</sup>  |                             |             |      |      |      |      |                        |
| Naturally occurring                       | 158 ± 0.2                   | 88          | 114  | 149  | 192  | 239  | 47.7 ± 1.0             |
| + Enriched/fortified                      | 497 ± 0.4                   | 286         | 365  | 471  | 600  | 739  | 0.3 ± 0.0              |
| + Dietary supplements                     | 592 ± 0.6                   | 302         | 391  | 523  | 719  | 992  | 0.3 ± 0.0              |
| <b>Thiamin, mg/d</b> <sup>10</sup>        |                             |             |      |      |      |      |                        |
| Naturally occurring                       | 0.8 ± 0.0                   | 0.5         | 0.6  | 0.8  | 0.9  | 1.1  | 8.8 ± 1.2              |

| Nutrient                               | Usual Intake <sup>2-3</sup> | Percentiles |      |      |      |      | % < EAR <sup>3-4</sup> |
|----------------------------------------|-----------------------------|-------------|------|------|------|------|------------------------|
|                                        |                             | 10          | 25   | 50   | 75   | 90   |                        |
| + Enriched/fortified                   | 1.5 ± 0.0                   | 0.9         | 1.1  | 1.4  | 1.7  | 2.1  | 0.2 ± 0.0              |
| + Dietary supplements                  | 1.6 ± 0.0                   | 0.9         | 1.2  | 1.5  | 1.9  | 2.5  | 0.2 ± 0.0              |
| <b>Riboflavin, mg/d</b> <sup>10</sup>  |                             |             |      |      |      |      |                        |
| Naturally occurring                    | 1.4 ± 0.0                   | 0.8         | 1.0  | 1.4  | 1.7  | 2.1  | 0.9 ± 0.2              |
| + Enriched/fortified                   | 2.0 ± 0.0                   | 1.2         | 1.5  | 1.9  | 2.4  | 2.9  | 0.1 ± 0.0              |
| + Dietary supplements                  | 2.2 ± 0.0                   | 1.2         | 1.5  | 2.0  | 2.6  | 3.3  | 0.1 ± 0.0              |
| <b>Niacin, mg/d</b> <sup>10</sup>      |                             |             |      |      |      |      |                        |
| Naturally occurring                    | 12.2 ± 0.0                  | 7.3         | 9.2  | 11.7 | 14.6 | 17.7 | 3.2 ± 0.4              |
| + Enriched/fortified                   | 19.1 ± 0.0                  | 11.7        | 14.6 | 18.4 | 22.8 | 27.4 | 0.1 ± 0.0              |
| + Dietary supplements                  | 20.6 ± 0.0                  | 12.0        | 15.0 | 19.2 | 24.6 | 31.0 | 0.2 ± 0.0              |
| <b>Iron, mg/d</b> <sup>5</sup>         |                             |             |      |      |      |      |                        |
| Naturally occurring                    | 7.0 ± 0.0                   | 4.4         | 5.4  | 6.8  | 8.3  | 9.9  | 5.1 ± 0.6              |
| + Enriched/fortified                   | 13.2 ± 0.0                  | 8.0         | 10.0 | 12.7 | 15.8 | 19.2 | 0.1 ± 0.0              |
| + Dietary supplements                  | 14.7 ± 0.0                  | 8.2         | 10.3 | 13.1 | 17.0 | 23.0 | 0.2 ± 0.0              |
| <b>Zinc, mg/d</b> <sup>5</sup>         |                             |             |      |      |      |      |                        |
| Naturally occurring                    | 8.2 ± 0.0                   | 5.1         | 6.3  | 7.9  | 9.8  | 11.7 | 1.6 ± 0.2              |
| + Enriched/fortified                   | 9.6 ± 0.0                   | 5.8         | 7.3  | 9.2  | 11.5 | 13.9 | 0.8 ± 0.2              |
| + Dietary supplements                  | 10.8 ± 0.0                  | 6.1         | 7.6  | 9.8  | 12.6 | 16.7 | 0.7 ± 0.2              |
| <b>Calcium, mg/d</b> <sup>7-8</sup>    |                             |             |      |      |      |      |                        |
| Naturally occurring                    | 982 ± 1.0                   | 584         | 738  | 941  | 1182 | 1433 | 23.2 ± 2.0             |
| + Enriched/fortified                   | 1082 ± 1.0                  | 638         | 809  | 1035 | 1304 | 1585 | 17.1 ± 1.4             |
| + Dietary supplements                  | 1095 ± 1.0                  | 646         | 810  | 1048 | 1319 | 1603 | 16.4 ± 1.4             |
| <b>Magnesium, mg/d</b> <sup>8</sup>    |                             |             |      |      |      |      |                        |
| Naturally occurring                    | 230 ± 0.0                   | 142         | 176  | 221  | 275  | 331  | 1.7 ± 0.2              |
| + Enriched/fortified                   | 233 ± 0.0                   | 143         | 178  | 223  | 278  | 335  | 1.6 ± 0.2              |
| + Dietary supplements                  | 235 ± 0.0                   | 144         | 179  | 225  | 280  | 337  | 1.6 ± 0.2              |
| <b>Potassium, g/d</b> <sup>12-13</sup> |                             |             |      |      |      |      | <b>% &gt;AI</b>        |
| Naturally occurring                    | 2221 ± 1.0                  | 1382        | 1723 | 2154 | 2648 | 3144 | 5.9 ± 0.4              |
| + Enriched/fortified                   | 2225 ± 1.0                  | 1388        | 1727 | 2157 | 2651 | 3148 | 6.0 ± 0.6              |
| + Dietary supplements                  | 2225 ± 1.0                  | 1388        | 1727 | 2158 | 2651 | 3148 | 6.0 ± 0.6              |

<sup>1</sup> Source: What We Eat in America, NHANES 2009-2012 [9] (n=2871 children 2-8 years of age). AI, adequate intake; AT, a-tocopherol; DFE, dietary folate equivalents; EAR, estimated average requirement; NHANES, National Health and Nutrition Examination Survey; RAE, retinol activity equivalents; SEM, standard error of the mean; U.S., United States.

<sup>2</sup> Values are mean  $\pm$  SEM and percentiles for usual intakes estimated using the National Cancer Institute Method [14, 15].

<sup>3</sup> SEM is  $<0.01$  where SEM is 0.0 in the table.

<sup>4</sup> Values are mean  $\pm$  SEM for the percent below the EAR [16-19, 34].

<sup>5</sup> Dietary Reference Intakes for Vitamin A, Vitamin K, Arsenic, Boron, Chromium, Copper, Iodine, Iron, Manganese, Molybdenum, Nickel, Silicon, Vanadium, and Zinc (2001) [19].

<sup>6</sup> A supplements file is not currently available for Vitamins A and E in NHANES for 2009-2012, and it will be released at a later date.

<sup>7</sup> Dietary Reference Intakes for Calcium and Vitamin D (2011) [34].

<sup>8</sup> Dietary Reference Intakes for Calcium, Phosphorous, Magnesium, Vitamin D, and Fluoride (1997) [17].

<sup>9</sup> Dietary Reference Intakes for Vitamin C, Vitamin E, Selenium, and Carotenoids (2000) [18].

<sup>10</sup> Dietary Reference Intakes for Thiamin, Riboflavin, Niacin, Vitamin B6, Folate, Vitamin B12, Pantothenic Acid, Biotin, and Choline (1998) [16].

<sup>11</sup> Folate EAR is presented as dietary folate equivalents (DFE). 1 DFE=1  $\mu\text{g}$  food folate=0.6  $\mu\text{g}$  of folic acid from fortified food or supplement consumed with food=5  $\mu\text{g}$  of a supplement taken on an empty stomach.

<sup>12</sup> Dietary Reference Intakes for Water, Potassium, Sodium, Chloride, and Sulfate (2005) [23].

<sup>132</sup> The AI approach was used for potassium [23].

**Supplemental Table 2.** Usual Intake from NHANES 2009-2012 Compared to the Dietary Reference Intakes (DRI) from Nutrients as Naturally Occurring, Enriched/Fortified, and Dietary Supplements among **Children 9-18 years of age** in the U.S. Population <sup>1</sup>

| Nutrient                                              | Usual Intake <sup>2-3</sup> | Percentiles |      |      |      |      | % < EAR <sup>3-4</sup> |
|-------------------------------------------------------|-----------------------------|-------------|------|------|------|------|------------------------|
|                                                       |                             | 10          | 25   | 50   | 75   | 90   |                        |
| <b>Vitamin A</b> , $\mu\text{g RAE/d}$ <sup>5-6</sup> |                             |             |      |      |      |      |                        |
| Naturally occurring                                   | 381 $\pm$ 0                 | 197         | 262  | 354  | 470  | 599  | 75.5 $\pm$ 6.4         |
| + Enriched/fortified                                  | 608 $\pm$ 0                 | 310         | 418  | 568  | 754  | 958  | 37.7 $\pm$ 2.2         |
| + Dietary supplements                                 | --                          | --          | --   | --   | --   | --   | --                     |
| <b>Vitamin D</b> , $\mu\text{g/d}$ <sup>7-8</sup>     |                             |             |      |      |      |      |                        |
| Naturally occurring                                   | 1.3 $\pm$ 0.0               | 0.6         | 0.9  | 1.2  | 1.7  | 2.2  | 100 $\pm$ 0.0          |
| + Enriched/fortified                                  | 5.7 $\pm$ 0.0               | 2.5         | 3.6  | 5.2  | 7.2  | 9.4  | 92.1 $\pm$ 1.2         |
| + Dietary supplements                                 | 6.9 $\pm$ 0.0               | 2.6         | 3.8  | 5.6  | 8.1  | 12.5 | 84.1 $\pm$ 1.0         |
| <b>Vitamin E</b> , mg AT/d <sup>6,9</sup>             |                             |             |      |      |      |      |                        |
| Naturally occurring                                   | 6.7 $\pm$ 0.0               | 3.8         | 4.9  | 6.3  | 8.1  | 9.9  | 90.8 $\pm$ 0.8         |
| + Enriched/fortified                                  | 7.2 $\pm$ 0.0               | 4.0         | 5.2  | 6.7  | 8.7  | 10.9 | 86.2 $\pm$ 1.0         |
| + Dietary supplements                                 | --                          | --          | --   | --   | --   | --   | --                     |
| <b>Vitamin C</b> , mg/d <sup>9</sup>                  |                             |             |      |      |      |      |                        |
| Naturally occurring                                   | 50.5 $\pm$ 0.0              | 17.1        | 27.0 | 42.9 | 65.7 | 93.6 | 56.0 $\pm$ 2.2         |
| + Enriched/fortified                                  | 74.8 $\pm$ 0.0              | 27.5        | 42.2 | 65.2 | 96.8 | 134  | 32.3 $\pm$ 1.6         |
| + Dietary supplements                                 | 92.1 $\pm$ 0.2              | 28.8        | 44.6 | 70.1 | 107  | 156  | 29.4 $\pm$ 1.6         |
| <b>Vitamin B-6</b> , mg/d <sup>10</sup>               |                             |             |      |      |      |      |                        |
| Naturally occurring                                   | 1.4 $\pm$ 0.0               | 0.9         | 1.1  | 1.3  | 1.6  | 2.0  | 13.7 $\pm$ 1.2         |
| + Enriched/fortified                                  | 1.8 $\pm$ 0.0               | 1.1         | 1.4  | 1.7  | 2.2  | 2.7  | 4.3 $\pm$ 0.6          |
| + Dietary supplements                                 | 2.1 $\pm$ 0.0               | 1.1         | 1.4  | 1.8  | 2.4  | 3.1  | 4.0 $\pm$ 0.6          |
| <b>Vitamin B-12</b> , $\mu\text{g/d}$ <sup>10</sup>   |                             |             |      |      |      |      |                        |
| Naturally occurring                                   | 4.0 $\pm$ 0.0               | 2.2         | 2.9  | 3.8  | 4.9  | 6.1  | 3.9 $\pm$ 0.6          |
| + Enriched/fortified                                  | 5.3 $\pm$ 0.0               | 2.8         | 3.7  | 4.9  | 6.5  | 8.2  | 1.6 $\pm$ 0.2          |
| + Dietary supplements                                 | 7.5 $\pm$ 0.0               | 2.8         | 3.8  | 5.2  | 7.1  | 9.8  | 1.5 $\pm$ 0.2          |
| <b>Folate</b> , $\mu\text{g DFE/d}$ <sup>10-11</sup>  |                             |             |      |      |      |      |                        |
| Naturally occurring                                   | 179 $\pm$ 0                 | 102         | 131  | 170  | 218  | 269  | 91.6 $\pm$ 0.8         |
| + Enriched/fortified                                  | 562 $\pm$ 0                 | 330         | 417  | 534  | 677  | 831  | 6.1 $\pm$ 0.8          |
| + Dietary supplements                                 | 616 $\pm$ 0                 | 337         | 428  | 558  | 731  | 971  | 5.7 $\pm$ 0.8          |
| <b>Thiamin</b> , mg/d <sup>10</sup>                   |                             |             |      |      |      |      |                        |

| <b>Nutrient</b>                         | <b>Usual Intake</b> <sup>2-3</sup> | <b>Percentiles</b> |           |           |           |           | <b>% &lt; EAR</b> <sup>3-4</sup> |
|-----------------------------------------|------------------------------------|--------------------|-----------|-----------|-----------|-----------|----------------------------------|
|                                         |                                    | <b>10</b>          | <b>25</b> | <b>50</b> | <b>75</b> | <b>90</b> |                                  |
| Naturally occurring                     | 0.9 ± 0.0                          | 0.6                | 0.7       | 0.9       | 1.1       | 1.3       | 43.5 ± 2.0                       |
| + Enriched/fortified                    | 1.6 ± 0.0                          | 1.0                | 1.3       | 1.6       | 2.0       | 2.3       | 3.2 ± 0.4                        |
| + Dietary supplements                   | 1.8 ± 0.0                          | 1.1                | 1.3       | 1.6       | 2.0       | 2.6       | 3.1 ± 0.4                        |
| <b>Riboflavin, mg/d</b> <sup>10</sup>   |                                    |                    |           |           |           |           |                                  |
| Naturally occurring                     | 1.4 ± 0.0                          | 0.8                | 1.0       | 1.3       | 1.7       | 2.1       | 18 ± 1.2                         |
| + Enriched/fortified                    | 2.0 ± 0.0                          | 1.2                | 1.5       | 1.9       | 2.4       | 3.0       | 3.1 ± 0.4                        |
| + Dietary supplements                   | 2.2 ± 0.0                          | 1.2                | 1.5       | 2.0       | 2.6       | 3.2       | 2.9 ± 0.4                        |
| <b>Niacin, mg/d</b> <sup>10</sup>       |                                    |                    |           |           |           |           |                                  |
| Naturally occurring                     | 15.4 ± 0.0                         | 9.4                | 11.7      | 14.8      | 18.4      | 22.1      | 13.6 ± 1.4                       |
| + Enriched/fortified                    | 23.5 ± 0.0                         | 14.7               | 18.1      | 22.6      | 27.9      | 33.3      | 1.1 ± 0.2                        |
| + Dietary supplements                   | 24.6 ± 0.0                         | 14.9               | 18.4      | 23.2      | 29.0      | 35.7      | 1.1 ± 0.2                        |
| <b>Iron, mg/d</b> <sup>5</sup>          |                                    |                    |           |           |           |           |                                  |
| Naturally occurring                     | 8.5 ± 0.0                          | 5.5                | 6.7       | 8.2       | 10.0      | 11.9      | 26.2 ± 1.6                       |
| + Enriched/fortified                    | 15.1 ± 0.0                         | 9.3                | 11.5      | 14.5      | 18.0      | 21.8      | 2.0 ± 0.4                        |
| + Dietary supplements                   | 16.2 ± 0.0                         | 9.4                | 11.7      | 14.8      | 18.7      | 23.6      | 1.9 ± 0.4                        |
| <b>Zinc, mg/d</b> <sup>5</sup>          |                                    |                    |           |           |           |           |                                  |
| Naturally occurring                     | 9.6 ± 0.0                          | 6.1                | 7.5       | 9.3       | 11.4      | 13.6      | 24.4 ± 2.0                       |
| + Enriched/fortified                    | 10.9 ± 0.0                         | 6.7                | 8.3       | 10.4      | 13.0      | 15.7      | 16.2 ± 1.4                       |
| + Dietary supplements                   | 11.7 ± 0.0                         | 6.8                | 8.5       | 10.8      | 13.6      | 17.4      | 15 ± 1.4                         |
| <b>Calcium, mg/d</b> <sup>7-8</sup>     |                                    |                    |           |           |           |           |                                  |
| Naturally occurring                     | 994 ± 1.0                          | 593                | 747       | 952       | 1194      | 1450      | 66.5 ± 1.8                       |
| + Enriched/fortified                    | 1073 ± 1.0                         | 632                | 801       | 1026      | 1293      | 1575      | 57.8 ± 2.0                       |
| + Dietary supplements                   | 1089 ± 1.0                         | 640                | 811       | 1040      | 1313      | 1602      | 56.3 ± 2.0                       |
| <b>Magnesium, mg/d</b> <sup>8</sup>     |                                    |                    |           |           |           |           |                                  |
| Naturally occurring                     | 252 ± 0.0                          | 157                | 194       | 242       | 300       | 360       | 53.1 ± 1.6                       |
| + Enriched/fortified                    | 254 ± 0.0                          | 157                | 194       | 243       | 302       | 363       | 52.6 ± 1.6                       |
| + Dietary supplements                   | 256 ± 0.0                          | 159                | 196       | 246       | 305       | 367       | 51.6 ± 1.8                       |
| <b>Potassium, mg/d</b> <sup>12-13</sup> |                                    |                    |           |           |           |           | <b>% &gt; AI</b>                 |
| Naturally occurring                     | 2299 ± 1.0                         | 1442               | 1788      | 2232      | 2735      | 3244      | 0.4 ± 0.0                        |
| + Enriched/fortified                    | 2318 ± 1.0                         | 1459               | 1805      | 2250      | 2754      | 3267      | 0.5 ± 0.2                        |
| + Dietary supplements                   | 2318 ± 1.0                         | 1459               | 1806      | 2251      | 2755      | 3268      | 0.5 ± 0.2                        |

<sup>1</sup> Source: What We Eat in America, NHANES 2009-2012 [9] (n=3238 children 9-18 years of age). AI, adequate intake; AT, a-tocopherol; DFE, dietary folate

equivalents; EAR, estimated average requirement; NHANES, National Health and Nutrition Examination Survey; RAE, retinol activity equivalents; SEM, standard error of the mean; U.S., United States.

<sup>2</sup> Values are mean  $\pm$  SEM and percentiles for usual intakes estimated using the National Cancer Institute Method [14, 15].

<sup>3</sup> SEM is <0.01 where SEM is 0.0 in the table.

<sup>4</sup> Values are mean  $\pm$  SEM for the percent below the EAR [16-19, 34].

<sup>5</sup> Dietary Reference Intakes for Vitamin A, Vitamin K, Arsenic, Boron, Chromium, Copper, Iodine, Iron, Manganese, Molybdenum, Nickel, Silicon, Vanadium, and Zinc (2001) [19].

<sup>6</sup> A supplements file is not currently available for Vitamins A and E in NHANES for 2009-2012, and it will be released at a later date.

<sup>7</sup> Dietary Reference Intakes for Calcium and Vitamin D (2011) [19].

<sup>8</sup> Dietary Reference Intakes for Calcium, Phosphorous, Magnesium, Vitamin D, and Fluoride (1997) [17].

<sup>9</sup> Dietary Reference Intakes for Vitamin C, Vitamin E, Selenium, and Carotenoids (2000) [18].

<sup>10</sup> Dietary Reference Intakes for Thiamin, Riboflavin, Niacin, Vitamin B6, Folate, Vitamin B12, Pantothenic Acid, Biotin, and Choline (1998) [16].

<sup>11</sup> Folate EAR is presented as dietary folate equivalents (DFE). 1 DFE=1  $\mu$ g food folate=0.6  $\mu$ g of folic acid from fortified food or supplement consumed with food=5  $\mu$ g of a supplement taken on an empty stomach.

<sup>12</sup> Dietary Reference Intakes for Water, Potassium, Sodium, Chloride, and Sulfate (2005) [23].

<sup>13</sup> The AI approach was used for potassium [23].
